# Supplementary material for: Phenotypic Diversity within Ugandan Yam (Dioscorea species) Germplasm Collection
Source: Hindawi journal article supplement (doi:10.1155/2022/5826012), 2022-12-19
Supplement: f1 [file 5826012.f1.docx]

**Table S1: List of genotypes and their geographical origin**

| No. | Genotypes | Codes | Source | Spiece | Description |
| --- | --- | --- | --- | --- | --- |
| 1 | UGY16001 | UG-TDa-20 | NaCRRI/Uganda | D. alata | Landrace |
| 2 | UGY16002 | UG-TDr-26 | NaCRRI/Uganda | D. rotundata | Landrace |
| 3 | UGY16003 | UG-TDr-27 | NaCRRI/Uganda | D. rotundata | Landrace |
| 4 | UGY16004 | UG-TDr-28 | NaCRRI/Uganda | D. rotundata | Landrace |
| 5 | UGY16005 | UG-TDa-21 | NaCRRI/Uganda | D. alata | Landrace |
| 6 | UGY16006 | UG-TDr-29 | NaCRRI/Uganda | D. rotundata | Landrace |
| 7 | UGY16007 | UG-TDa-22 | NaCRRI/Uganda | D. alata | Landrace |
| 8 | UGY16008 | UG-TDa-23 | NaCRRI/Uganda | D. alata | Landrace |
| 9 | UGY16009 | UG-TDa-24 | NaCRRI/Uganda | D. alata | Landrace |
| 10 | UGY16010 | UG-TDr-30 | NaCRRI/Uganda | D. rotundata | Landrace |
| 11 | UGY16011 | UG-TDr-31 | NaCRRI/Uganda | D. rotundata | Landrace |
| 12 | UGY16012 | UG-TDa-25 | NaCRRI/Uganda | D. alata | Landrace |
| 13 | UGY16013 | UG-TDr-32 | NaCRRI/Uganda | D. rotundata | Landrace |
| 14 | UGY16014 | UG-TDa-26 | NaCRRI/Uganda | D. alata | Landrace |
| 15 | UGY16015 | UG-TDa-27 | NaCRRI/Uganda | D. alata | Landrace |
| 16 | UGY16016 | UG-TDr-33 | NaCRRI/Uganda | D. rotundata | Landrace |
| 17 | UGY16017 | UG-TDa-28 | NaCRRI/Uganda | D. alata | Landrace |
| 18 | UGY16018 | UG-TDa-04 | NaCRRI/Uganda | D. Alata | Landrace |
| 19 | UGY16019 | UG-TDa-29 | NaCRRI/Uganda | D. alata | Landrace |
| 20 | UGY16020 | UG-TDa-30 | NaCRRI/Uganda | D. alata | Landrace |
| 21 | UGY16021 | UG-TDa-31 | NaCRRI/Uganda | D. alata | Landrace |
| 22 | UGY16022 | UG-TDr-34 | NaCRRI/Uganda | D. rotundata | Landrace |
| 23 | UGY16023 | UG-TDa-32 | NaCRRI/Uganda | D. alata | Landrace |
| 24 | UGY16024 | UG-TDr-35 | NaCRRI/Uganda | D. rotundata | Landrace |
| 25 | UGY16025 | UG-TDa-33 | NaCRRI/Uganda | D. alata | Landrace |
| 26 | UGY16026 | UG-TDr-36 | NaCRRI/Uganda | D. rotundata | Landrace |
| 27 | UGY16027 | UG-TDr-37 | NaCRRI/Uganda | D. rotundata | Landrace |
| 28 | UGY16028 | UG-TDa-34 | NaCRRI/Uganda | D. alata | Landrace |
| 29 | UGY16029 | UG-TDr-38 | NaCRRI/Uganda | D. rotundata | Landrace |
| 30 | UGY16030 | UG-TDa-35 | NaCRRI/Uganda | D. alata | Landrace |
| 31 | UGY16031 | UG-TDa-36 | NaCRRI/Uganda | D. alata | Landrace |
| 32 | UGY16032 | UG-TDa-37 | NaCRRI/Uganda | D. alata | Landrace |
| 33 | UGY16033 | UG-TDr-39 | NaCRRI/Uganda | D. rotundata | Landrace |
| 34 | UGY16034 | UG-TDr-40 | NaCRRI/Uganda | D. rotundata | Landrace |
| 35 | UGY16035 | UG-TDr-41 | NaCRRI/Uganda | D. rotundata | Landrace |
| 36 | UGY16036 | UG-TDa-38 | NaCRRI/Uganda | D. alata | Landrace |
| 37 | UGY16037 | UG-TDr-42 | NaCRRI/Uganda | D. rotundata | Landrace |
| 38 | UGY16038 | UG-TDa-39 | NaCRRI/Uganda | D. alata | Landrace |
| 39 | UGY16039 | UG-TDr-43 | NaCRRI/Uganda | D. rotundata | Landrace |
| 40 | UGY16040 | UG-TDa-40 | NaCRRI/Uganda | D. alata | Landrace |
| 41 | UGY16041 | UG-TDr-44 | NaCRRI/Uganda | D. rotundata | Landrace |
| 42 | UGY16042 | UG-TDr-45 | NaCRRI/Uganda | D. rotundata | Landrace |
| 43 | UGY16043 | UG-TDa-41 | NaCRRI/Uganda | D. alata | Landrace |
| 44 | UGY16044 | UG-TDr-46 | NaCRRI/Uganda | D. rotundata | Landrace |
| 45 | UGY16045 | UG-TDr-47 | NaCRRI/Uganda | D. rotundata | Landrace |
| 46 | UGY16064 | UG-TDr-01 | IITA/Uganda | D. rotundata | Landrace |
| 47 | UGY16065 | UG-TDr-02 | IITA/Uganda | D. rotundata | Landrace |
| 48 | UGY16066 | UG-TDr-03 | IITA/Uganda | D. rotundata | Landrace |
| 49 | UGY16067 | UG-TDr-04 | IITA/Uganda | D. rotundata | Landrace |
| 50 | UGY16068 | UG-TDr-05 | IITA/Uganda | D. rotundata | Landrace |
| 51 | UGY16069 | UG-TDr-06 | IITA/Uganda | D. rotundata | Landrace |
| 52 | UGY16070 | UG-TDr-07 | IITA/Uganda | D. rotundata | Landrace |
| 53 | UGY16071 | UG-TDr-08 | IITA/Uganda | D. rotundata | Landrace |
| 54 | UGY16072 | UG-TDa-05 | IITA/Uganda | D. alata | Landrace |
| 55 | UGY16073 | UG-TDr-09 | IITA/Uganda | D. rotundata | Landrace |
| 56 | UGY16074 | UG-TDr-10 | IITA/Uganda | D. rotundata | Landrace |
| 57 | UGY16075 | UG-TDr-11 | IITA/Uganda | D. rotundata | Landrace |
| 58 | UGY16076 | UG-TDr-12 | IITA/Uganda | D. rotundata | Landrace |
| 59 | UGY16077 | UG-TDa-06 | IITA/Uganda | D. alata | Landrace |
| 60 | UGY16078 | UG-TDa-07 | IITA/Uganda | D. alata | Landrace |
| 61 | UGY16079 | UG-TDa-08 | IITA/Uganda | D. alata | Landrace |
| 62 | UGY16080 | UG-TDa-09 | IITA/Uganda | D. alata | Landrace |
| 63 | UGY16081 | UG-TDa-10 | IITA/Uganda | D. alata | Landrace |
| 64 | UGY16082 | UG-TDa-11 | IITA/Uganda | D. alata | Landrace |
| 65 | UGY16083 | UG-TDa-12 | IITA/Uganda | D. alata | Landrace |
| 66 | UGY16084 | UG-TDa-13 | IITA/Uganda | D. alata | Landrace |
| 67 | UGY16085 | UG-TDa-14 | IITA/Uganda | D. alata | Landrace |
| 68 | UGY16086 | UG-TDa-15 | IITA/Uganda | D. alata | Landrace |
| 69 | UGY16087 | UG-TDa-16 | IITA/Uganda | D. alata | Landrace |
| 70 | UGY16088 | UG-TDa-17 | IITA/Uganda | D. alata | Landrace |
| 71 | UGY16089 | UG-TDa-18 | IITA/Uganda | D. alata | Landrace |
| 72 | UGY16090 | UG-TDa-19 | IITA/Uganda | D. alata | Landrace |
| 73 | UGY16091 | UG-TDr-13 | IITA/Uganda | D. rotundata | Landrace |
| 74 | UGY19006 | UG-TDr-14 | IITA/Uganda | D. rotundata | Landrace |
| 75 | UGY19007 | UG-TDr-15 | IITA/Uganda | D. rotundata | Landrace |
| 76 | UGY19008 | UG-TDr-16 | IITA/Uganda | D. rotundata | Landrace |
| 77 | UGY19009 | UG-TDr-17 | IITA/Uganda | D. rotundata | Landrace |
| 78 | UGY19010 | UG-TDa-01 | IITA/Uganda | D. alata | Landrace |
| 79 | UGY19011 | UG-TDd-18 | IITA/Uganda | D.damtorium | Landrace |
| 80 | UGY19012 | UG-TDa-02 | IITA/Uganda | D. alata | Landrace |
| 81 | UGY19013 | UG-TDr-19 | IITA/Uganda | D. rotundata | Landrace |
| 82 | UGY19014 | UG-TDr-20 | IITA/Uganda | D. rotundata | Landrace |
| 83 | UGY19015 | UG-TDr-21 | IITA/Uganda | D. rotundata | Landrace |
| 84 | UGY19016 | UG-TDr-22 | IITA/Uganda | D. rotundata | Landrace |
| 85 | UGY19017 | UG-TDr-23 | IITA/Uganda | D. rotundata | Landrace |
| 86 | UGY19018 | UG-TDd-24 | IITA/Uganda | D.damtorium | Landrace |
| 87 | UGY19019 | UG-TDr-25 | IITA/Uganda | D. rotundata | Landrace |
| 88 | UGY19020 | UG-TDa-03 | IITA/Uganda | D. alata | Landrace |
| 89 | UGY20001 | GH-TDa-01 | Ghana | D. alata | Clones |
| 90 | UGY20002 | GH-TDa-02 | Ghana | D. alata | Clones |
| 91 | UGY20003 | GH-TDa-03 | Ghana | D. alata | Clones |
| 92 | UGY20004 | GH-TDa-04 | Ghana | D. alata | Clones |
| 93 | UGY20005 | GH-TDa-05 | Ghana | D. alata | Clones |
| 94 | UGY20006 | GH-TDa-06 | Ghana | D. alata | Clones |
| 95 | UGY20007 | GH-TDa-07 | Ghana | D. alata | Clones |
| 96 | UGY20008 | GH-TDa-08 | Ghana | D. alata | Landrace |
| 97 | UGY20009 | GH-TDa-09 | Ghana | D. alata | Clones |
| 98 | UGY20010 | GH-TDa-10 | Ghana | D. alata | Clones |
| 99 | UGY20011 | GH-TDa-11 | Ghana | D. alata | Landrace |
| 100 | UGY20012 | GH-TDa-12 | Ghana | D. alata | Clones |
| 101 | UGY20013 | GH-TDa-13 | Ghana | D. alata | Clones |
| 102 | UGY20014 | IITA-TDa-01 | Nigeria | D. alata | Clones |
| 103 | UGY20015 | IITA-TDa-02 | Nigeria | D. alata | Landrace |
| 104 | UGY20016 | IITA-TDa-03 | Nigeria | D. alata | Landrace |
| 105 | UGY20017 | IITA-TDa-04 | Nigeria | D. alata | Landrace |
| 106 | UGY20018 | IITA-TDa-05 | Nigeria | D. alata | Landrace |
| 107 | UGY20019 | IITA-TDa-06 | Nigeria | D. alata | Clones |
| 108 | UGY20020 | IITA-TDa-07 | Nigeria | D. alata | Clones |
| 109 | UGY20021 | IITA-TDa-08 | Nigeria | D. alata | Clones |
| 110 | UGY20022 | IITA-TDa-09 | Nigeria | D. alata | Clones |
| 111 | UGY20023 | IITA-TDa-10 | Nigeria | D. alata | Clones |
| 112 | UGY20024 | IITA-TDa-11 | Nigeria | D. alata | Clones |
| 113 | UGY20025 | IITA-TDa-12 | Nigeria | D. alata | Clones |
| 113 | UGY20026 | IITA-TDa-13 | Nigeria | D. alata | Clones |
| 114 | UGY20027 | IITA-TDa-14 | Nigeria | D. alata | Clones |
| 115 | UGY20028 | IITA-TDa-15 | Nigeria | D. alata | Clones |
| 116 | UGY20029 | IITA-TDa-16 | Nigeria | D. alata | Clones |
| 117 | UGY20030 | IITA-TDa-17 | Nigeria | D. alata | Clones |
| 118 | UGY20031 | IITA-TDa-18 | Nigeria | D. alata | Clones |
| 120 | UGY20032 | IITA-TDa-19 | Nigeria | D. alata | Clones |
| 119 | UGY20033 | GH-TDr-01 | Ghana | D. rotundata | Landrace |
| 120 | UGY20034 | GH-TDr-02 | Ghana | D. rotundata | Clones |
| 121 | UGY20035 | GH-TDr-03 | Ghana | D. rotundata | Clones |
| 122 | UGY20036 | GH-TDr-04 | Ghana | D. rotundata | Clones |
| 123 | UGY20037 | GH-TDr-05 | Ghana | D. rotundata | Landrace |
| 124 | UGY20038 | GH-TDr-06 | Ghana | D. rotundata | Clones |
| 125 | UGY20039 | GH-TDr-07 | Ghana | D. rotundata | Landrace |
| 126 | UGY20040 | GH-TDr-08 | Ghana | D. rotundata | Clones |
| 127 | UGY20041 | GH-TDr-09 | Ghana | D. rotundata | Clones |
| 128 | UGY20042 | GH-TDr-10 | Ghana | D. rotundata | Landrace |
| 129 | UGY20043 | GH-TDr-11 | Ghana | D. rotundata | Clones |
| 132 | UGY20044 | GH-TDr-12 | Ghana | D. rotundata | Clones |
| 130 | UGY20045 | GH-TDr-13 | Ghana | D. rotundata | Landrace |
| 131 | UGY20046 | GH-TDr-14 | Ghana | D. rotundata | Clones |
| 132 | UGY20047 | GH-TDr-15 | Ghana | D. rotundata | Clones |
| 133 | UGY20048 | GH-TDr-16 | Ghana | D. rotundata | Clones |
| 137 | UGY20049 | GH-TDr-17 | Ghana | D. rotundata | Clones |
| 134 | UGY20050 | GH-TDr-18 | Ghana | D. rotundata | Landrace |
| 135 | UGY20051 | GH-TDr-19 | Ghana | D. rotundata | Landrace |
| 136 | UGY20052 | GH-TDr-20 | Ghana | D. rotundata | Landrace |
| 137 | UGY20053 | GH-TDr-21 | Ghana | D. rotundata | Clones |
| 138 | UGY20054 | GH-TDr-22 | Ghana | D. rotundata | Clones |
| 139 | UGY20055 | GH-TDr-23 | Ghana | D. rotundata | Landrace |
| 140 | UGY20056 | GH-TDr-24 | Ghana | D. rotundata | Clones |
| 141 | UGY20057 | IITA-TDr-01 | Nigeria | D. rotundata | Clones |
| 142 | UGY20058 | IITA-TDr-02 | Nigeria | D. rotundata | Clones |
| 143 | UGY20059 | GH-TDr-25 | Ghana | D. rotundata | Clones |
| 144 | UGY20060 | GH-TDr-26 | Ghana | D. rotundata | Clones |
| 145 | UGY20061 | GH-TDr-27 | Ghana | D. rotundata | Clones |
| 146 | UGY20062 | GH-TDr-28 | Ghana | D. rotundata | Clones |
| 147 | UGY20063 | GH-TDr-29 | Ghana | D. rotundata | Clones |
| 148 | UGY20064 | GH-TDr-30 | Ghana | D. rotundata | Landrace |
| 149 | UGY20065 | GH-TDr-31 | Ghana | D. rotundata | Landrace |
| 150 | UGY20066 | GH-TDr-32 | Ghana | D. rotundata | Clones |
| 151 | UGY20067 | GH-TDr-33 | Ghana | D. rotundata | Landrace |
| 152 | UGY20068 | GH-TDr-34 | Ghana | D. rotundata | Clones |
| 153 | UGY20069 | GH-TDr-35 | Ghana | D. rotundata | Landrace |
| 154 | UGY20070 | GH-TDr-36 | Ghana | D. rotundata | Landrace |
| 155 | UGY20071 | GH-TDr-37 | Ghana | D. rotundata | Clones |
| 156 | UGY20072 | GH-TDr-38 | Ghana | D. rotundata | Landrace |
| 157 | UGY20073 | GH-TDr-39 | Ghana | D. rotundata | Landrace |
| 158 | UGY20074 | GH-TDr-40 | Ghana | D. rotundata | Clones |
| 159 | UGY20075 | GH-TDr-41 | Ghana | D. rotundata | Landrace |
| 160 | UGY20076 | GH-TDr-42 | Ghana | D. rotundata | Landrace |
| 161 | UGY20077 | GH-TDr-43 | Ghana | D. rotundata | Landrace |
| 162 | UGY20078 | GH-TDr-44 | Ghana | D. rotundata | Landrace |
| 163 | UGY20079 | GH-TDr-45 | Ghana | D. rotundata | Landrace |
| 164 | UGY20080 | GH-TDr-46 | Ghana | D. rotundata | Landrace |
| 165 | UGY20081 | GH-TDr-47 | Ghana | D. rotundata | Landrace |
| 166 | UGY20082 | GH-TDr-48 | Ghana | D. rotundata | Clones |
| 167 | UGY20083 | GH-TDr-49 | Ghana | D. rotundata | Landrace |
| 168 | UGY20084 | GH-TDr-50 | Ghana | D. rotundata | Clones |
| 169 | UGY20085 | GH-TDr-51 | Ghana | D. rotundata | Landrace |
| 170 | UGY20086 | GH-TDr-52 | Ghana | D. rotundata | Clones |
| 171 | UGY20087 | GH-TDr-53 | Ghana | D. rotundata | Landrace |
| 172 | UGY20088 | GH-TDr-54 | Ghana | D. rotundata | Landrace |
| 173 | UGY20089 | GH-TDr-55 | Ghana | D. rotundata | Landrace |
| 174 | UGY20090 | GH-TDr-56 | Ghana | D. rotundata | Clones |
| 175 | UGY20091 | GH-TDr-57 | Ghana | D. rotundata | Clones |
| 176 | UGY20092 | GH-TDr-58 | Ghana | D. rotundata | Clones |
| 177 | UGY20093 | GH-TDr-59 | Ghana | D. rotundata | Clones |
| 178 | UGY20094 | GH-TDr-60 | Ghana | D. rotundata | Clones |
| 179 | UGY20095 | GH-TDr-61 | Ghana | D. rotundata | Clones |
| 180 | UGY20096 | GH-TDr-62 | Ghana | D. rotundata | Clones |
| 181 | UGY20097 | GH-TDr-63 | Ghana | D. rotundata | Clones |
| 182 | UGY20098 | GH-TDr-64 | Ghana | D. rotundata | Clones |
| 183 | UGY20099 | GH-TDr-65 | Ghana | D. rotundata | Clones |
| 184 | UGY20100 | GH-TDr-66 | Ghana | D. rotundata | Landrace |
| 185 | UGY20101 | GH-TDr-67 | Ghana | D. rotundata | Clones |
| 186 | UGY20102 | GH-TDr-68 | Ghana | D. rotundata | Landrace |
| 187 | UGY20103 | GH-TDr-69 | Ghana | D. rotundata | Landrace |
| 188 | UGY20104 | GH-TDr-70 | Ghana | D. rotundata | Landrace |
| 189 | UGY20105 | GH-TDr-71 | Ghana | D. rotundata | Landrace |
| 190 | UGY20106 | GH-TDr-72 | Ghana | D. rotundata | Landrace |
| 195 | UGY20107 | GH-TDr-73 | Ghana | D. rotundata | Clones |
| 191 | UGY20108 | GH-TDr-74 | Ghana | D. rotundata | Landrace |
| 192 | UGY20109 | GH-TDr-75 | Ghana | D. rotundata | Landrace |
| 193 | UGY20110 | GH-TDr-76 | Ghana | D. rotundata | Landrace |
| 194 | UGY20111 | GH-TDr-77 | Ghana | D. rotundata | Landrace |
| 195 | UGY20112 | GH-TDr-78 | Ghana | D. rotundata | Clones |
| 196 | UGY20113 | GH-TDr-79 | Ghana | D. rotundata | Landrace |
| 197 | UGY20114 | GH-TDr-80 | Ghana | D. rotundata | Landrace |
| 198 | UGY20115 | GH-TDr-81 | Ghana | D. rotundata | Clones |
| 199 | UGY20116 | IITA-TDr-03 | Nigeria | D. rotundata | Clones |
| 200 | UGY20117 | IITA-TDr-04 | Nigeria | D. rotundata | Clones |
| 201 | UGY20118 | IITA-TDr-05 | Nigeria | D. rotundata | Clones |
| 202 | UGY20119 | IITA-TDr-06 | Nigeria | D. rotundata | Clones |
| 203 | UGY20120 | IITA-TDr-07 | Nigeria | D. rotundata | Clones |
| 204 | UGY20121 | IITA-TDr-08 | Nigeria | D. rotundata | Clones |
| 205 | UGY20122 | IITA-TDr-09 | Nigeria | D. rotundata | Clones |
| 206 | UGY20123 | IITA-TDr-10 | Nigeria | D. rotundata | Clones |
| 207 | UGY20124 | IITA-TDr-11 | Nigeria | D. rotundata | Clones |
| 208 | UGY20125 | IITA-TDr-12 | Nigeria | D. rotundata | Clones |
| 209 | UGY20126 | IITA-TDr-13 | Nigeria | D. rotundata | Clones |
| 215 | UGY20127 | IITA-TDr-14 | Nigeria | D. rotundata | Clones |
| 210 | UGY20128 | IITA-TDr-15 | Nigeria | D. rotundata | Clones |
| 211 | UGY20129 | IITA-TDr-16 | Nigeria | D. rotundata | Clones |
| 212 | UGY20130 | IITA-TDr-17 | Nigeria | D. rotundata | Clones |
| 213 | UGY20131 | IITA-TDr-18 | Nigeria | D. rotundata | Clones |
| 214 | UGY20132 | IITA-TDr-19 | Nigeria | D. rotundata | Clones |
| 215 | UGY20133 | IITA-TDr-20 | Nigeria | D. rotundata | Clones |
| 216 | UGY20134 | IITA-TDr-21 | Nigeria | D. rotundata | Clones |
| 217 | UGY20135 | IITA-TDr-22 | Nigeria | D. rotundata | Clones |
| 218 | UGY20136 | IITA-TDr-23 | Nigeria | D. rotundata | Clones |
| 219 | UGY20137 | IITA-TDr-24 | Nigeria | D. rotundata | Clones |
| 220 | UGY20138 | IITA-TDr-25 | Nigeria | D. rotundata | Clones |
| 221 | UGY20139 | IITA-TDr-26 | Nigeria | D. rotundata | Clones |
| 222 | UGY20140 | IITA-TDr-27 | Nigeria | D. rotundata | Clones |
| 223 | UGY20141 | IITA-TDr-28 | Nigeria | D. rotundata | Clones |
| 224 | UGY20142 | IITA-TDr-29 | Nigeria | D. rotundata | Clones |
| 225 | UGY20143 | IITA-TDr-30 | Nigeria | D. rotundata | Clones |
| 226 | UGY20144 | IITA-TDr-31 | Nigeria | D. rotundata | Clones |
| 227 | UGY20145 | IITA-TDr-32 | Nigeria | D. rotundata | Clones |
| 228 | UGY20146 | IITA-TDr-33 | Nigeria | D. rotundata | Clones |
| 229 | UGY20147 | IITA-TDr-34 | Nigeria | D. rotundata | Clones |
| 230 | UGY20148 | IITA-TDr-35 | Nigeria | D. rotundata | Clones |
| 231 | UGY20149 | IITA-TDr-36 | Nigeria | D. rotundata | Clones |
| 232 | UGY20150 | IITA-TDr-37 | Nigeria | D. rotundata | Clones |
| 233 | UGY20151 | IITA-TDr-38 | Nigeria | D. rotundata | Clones |
| 234 | UGY20152 | IITA-TDr-39 | Nigeria | D. rotundata | Clones |
| 235 | UGY20153 | IITA-TDr-40 | Nigeria | D. rotundata | Clones |
| 236 | UGY20154 | IITA-TDr-41 | Nigeria | D. rotundata | Clones |
| 237 | UGY20155 | IITA-TDr-42 | Nigeria | D. rotundata | Clones |
| 238 | UGY20156 | IITA-TDr-43 | Nigeria | D. rotundata | Clones |
| 239 | UGY20157 | IITA-TDr-44 | Nigeria | D. rotundata | Clones |
| 240 | UGY20158 | IITA-TDr-45 | Nigeria | D. rotundata | Clones |
| 241 | UGY20159 | IITA-TDr-46 | Nigeria | D. rotundata | Clones |
| 242 | UGY20160 | IITA-TDr-47 | Nigeria | D. rotundata | Clones |
| 243 | UGY20161 | IITA-TDr-48 | Nigeria | D. rotundata | Clones |
| 244 | UGY20162 | IITA-TDr-49 | Nigeria | D. rotundata | Clones |
| 245 | UGY20163 | IITA-TDr-50 | Nigeria | D. rotundata | Clones |
| 246 | UGY20164 | IITA-TDr-51 | Nigeria | D. rotundata | Clones |
| 247 | UGY20165 | IITA-TDr-52 | Nigeria | D. rotundata | Clones |
| 248 | UGY20166 | IITA-TDr-53 | Nigeria | D. rotundata | Clones |
| 249 | UGY20167 | IITA-TDr-54 | Nigeria | D. rotundata | Clones |
| 250 | UGY20168 | IITA-TDr-55 | Nigeria | D. rotundata | Clones |
| 257 | UGY20169 | IITA-TDr-56 | Nigeria | D. rotundata | Clones |
| 251 | UGY20170 | IITA-TDr-57 | Nigeria | D. rotundata | Clones |
| 252 | UGY20171 | IITA-TDr-58 | Nigeria | D. rotundata | Clones |
| 253 | UGY20172 | IITA-TDr-59 | Nigeria | D. rotundata | Clones |
| 254 | UGY20173 | IITA-TDr-60 | Nigeria | D. rotundata | Clones |
| 255 | UGY20174 | IITA-TDr-61 | Nigeria | D. rotundata | Clones |
| 256 | UGY20175 | IITA-TDr-62 | Nigeria | D. rotundata | Clones |
| 257 | UGY20176 | IITA-TDr-63 | Nigeria | D. rotundata | Clones |
| 258 | UGY20177 | IITA-TDr-64 | Nigeria | D. rotundata | Clones |
| 259 | UGY20178 | IITA-TDr-65 | Nigeria | D. rotundata | Clones |
| 260 | UGY20179 | IITA-TDr-66 | Nigeria | D. rotundata | Clones |
| 261 | UGY20180 | IITA-TDr-67 | Nigeria | D. rotundata | Clones |
| 262 | UGY20181 | IITA-TDr-68 | Nigeria | D. rotundata | Clones |
| 263 | UGY20182 | IITA-TDr-69 | Nigeria | D. rotundata | Clones |
| 264 | UGY20183 | IITA-TDr-70 | Nigeria | D. rotundata | Clones |
| 265 | UGY20184 | IITA-TDr-71 | Nigeria | D. rotundata | Clones |
| 266 | UGY20185 | IITA-TDr-72 | Nigeria | D. rotundata | Clones |
| 267 | UGY20186 | IITA-TDr-73 | Nigeria | D. rotundata | Clones |
| 268 | UGY20187 | IITA-TDr-74 | Nigeria | D. rotundata | Clones |
| 269 | UGY20188 | IITA-TDr-75 | Nigeria | D. rotundata | Clones |
| 270 | UGY20189 | IITA-TDr-76 | Nigeria | D. rotundata | Landrace |
| 271 | UGY20190 | IITA-TDr-77 | Nigeria | D. rotundata | Clones |
| 272 | UGY20191 | IITA-TDr-78 | Nigeria | D. rotundata | Clones |
| 273 | UGY20192 | IITA-TDr-79 | Nigeria | D. rotundata | Clones |
| 274 | UGY20193 | IITA-TDr-80 | Nigeria | D. rotundata | Clones |
| 275 | UGY20194 | IITA-TDr-81 | Nigeria | D. rotundata | Clones |
| 276 | UGY20195 | IITA-TDr-82 | Nigeria | D. rotundata | Clones |
| 277 | UGY20196 | IITA-TDr-83 | Nigeria | D. rotundata | Clones |
| 278 | UGY20197 | GH-TDr-82 | Ghana | D. rotundata | Clones |
| 279 | UGY20198 | GH-TDr-83 | Ghana | D. rotundata | Clones |
| 280 | UGY20199 | GH-TDr-84 | Ghana | D. rotundata | Clones |
| 281 | UGY20200 | GH-TDr-85 | Ghana | D. rotundata | Clones |
| 282 | UGY20201 | GH-TDr-86 | Ghana | D. rotundata | Clones |
| 283 | UGY20202 | GH-TDr-87 | Ghana | D. rotundata | Clones |
| 291 | UGY20203 | GH-TDr-88 | Ghana | D. rotundata | Clones |
